# Supplementary material for: Actinide endohedral inter-metalloid clusters of the group 15 elements
Source: Royal Society of Chemistry journal article supplement (doi:10.1039/d4cp02546f), 2024-01-01
Supplement: d4cp02546f1.pdf [file d4cp02546f1.pdf]

## Electronic Supplementary Material (ESI)

### Actinide endohedral inter-metalloid clusters of the group 15 elements

*Nai-Xin Zhang,<sup>a,b</sup> Cong-Zhi Wang,<sup>\*a</sup> Jian-Hui Lan,<sup>a</sup> Qun-Yan Wu,<sup>a</sup> and Wei-Qun Shi<sup>\*a</sup>*

<sup>a</sup>Laboratory of Nuclear Energy Chemistry, Institute of High Energy Physics, Chinese  
Academy of Sciences, Beijing 100049, China

<sup>b</sup>College of Nuclear Science and Technology, Harbin Engineering University, Harbin 150001,  
China

\*E-mail: shiwq@ihep.ac.cn; wangcongzhi@ihep.ac.cn

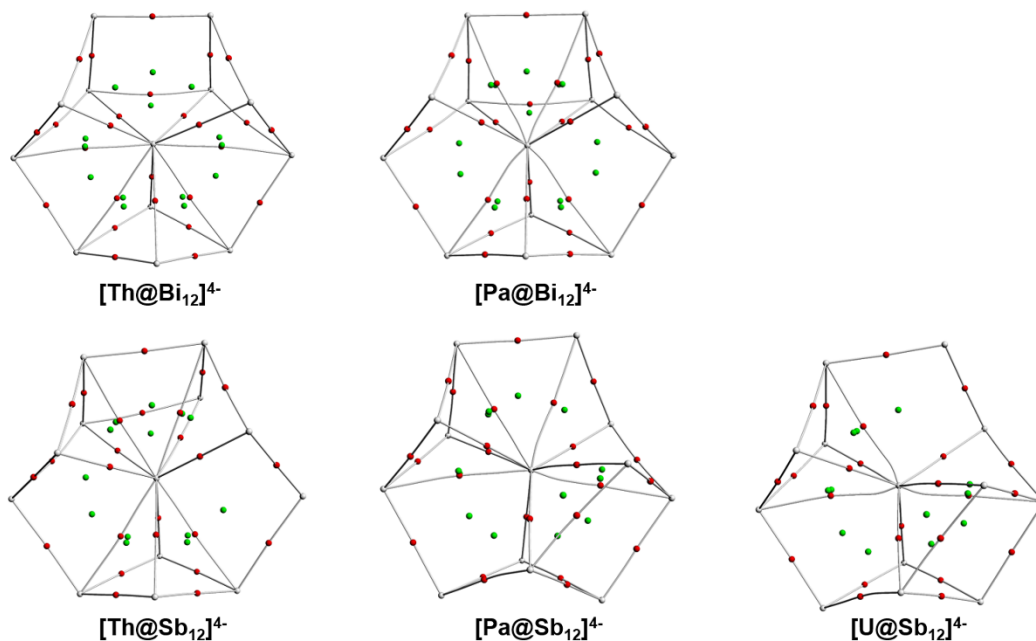

**Figure S1.** QTAIM analysis of  $[\text{An}@\text{Bi}_{12}]^{4-}$  (An = Th, Pa) and  $[\text{An}@\text{Sb}_{12}]^{4-}$  (An = Th, Pa, U). Red points represent bond critical points, gray lines represent bond paths, and green points represent ring critical points at the PBE-D3/RECP theoretical level.

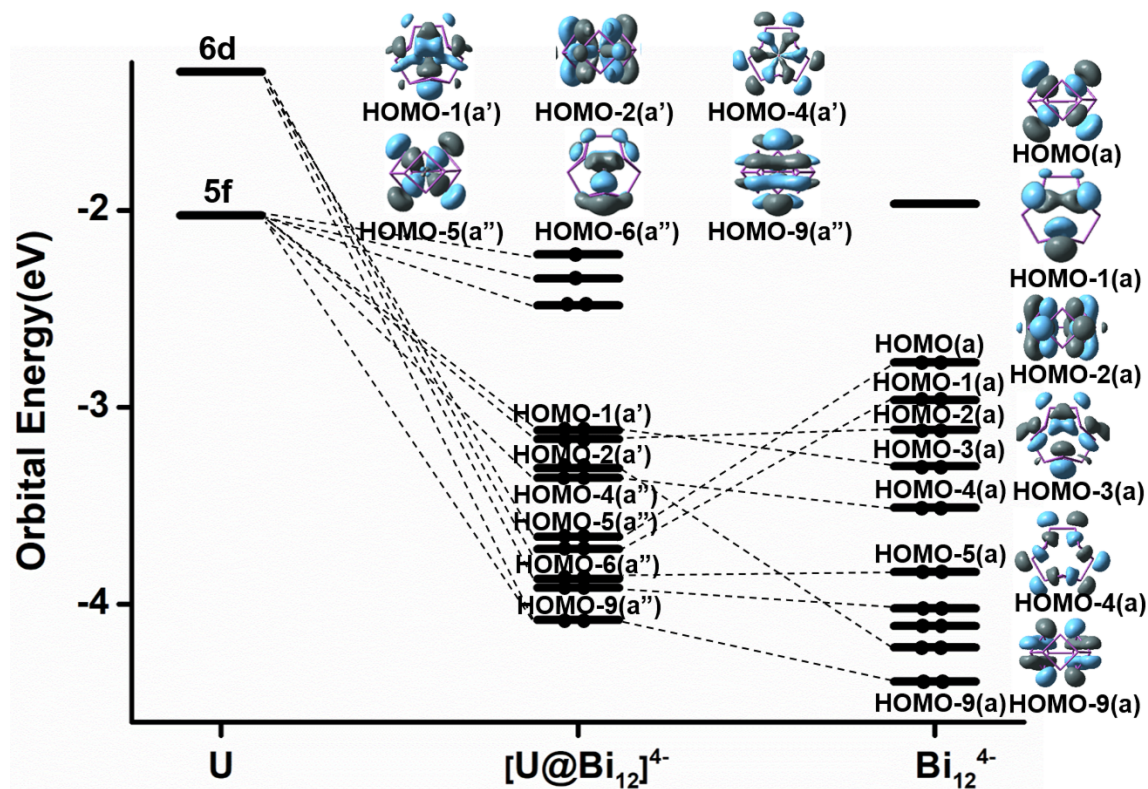

**Figure S2.** Orbital interaction diagram of  $[\text{U}@\text{Bi}_{12}]^{4-}$ .

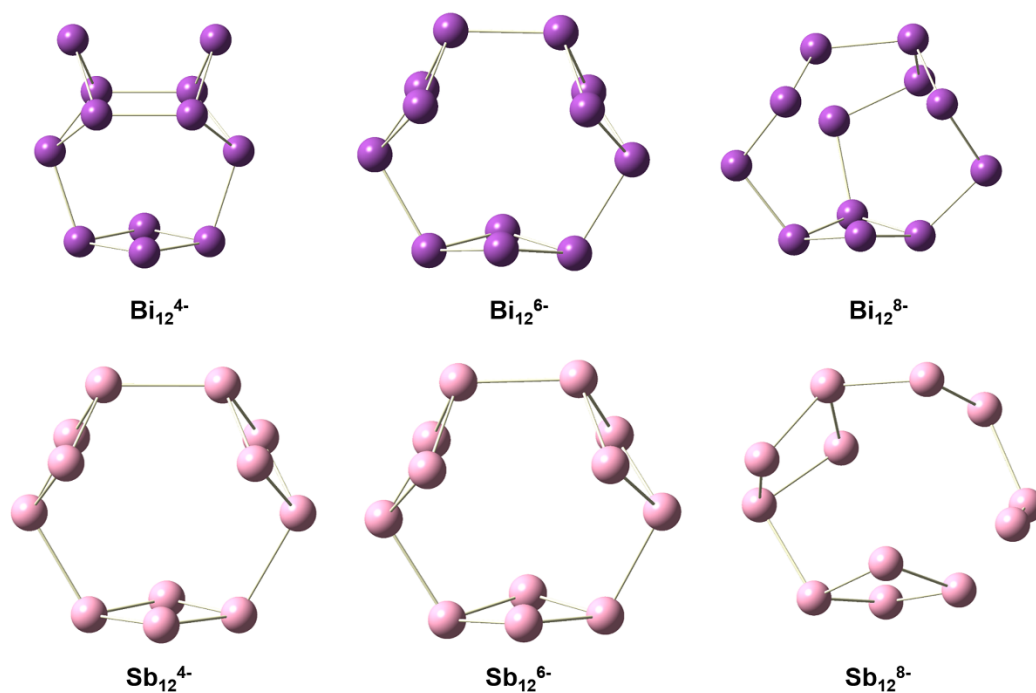

**Figure S3.** The optimized structures of the empty cages.

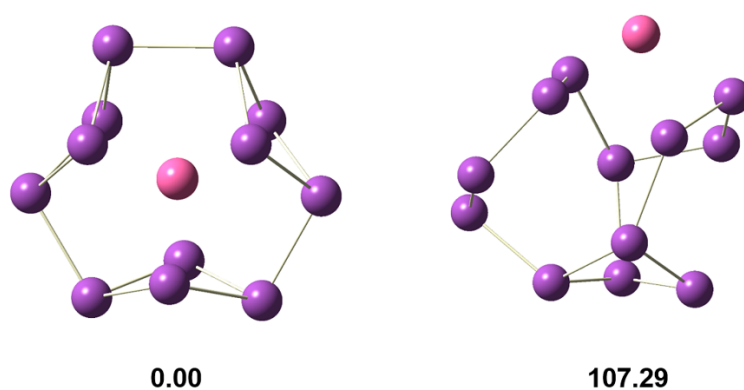

**Figure S4.** The optimized structures of the endohedral isomer and side-attached isomers of  $[\text{U}@\text{Bi}_{12}]^{4+}$  with the relative energy (kcal/mol) at the theoretical level of PBE-D3/RECP.

**Table S1.** Relative energies (kcal/mol) for the  $[\text{An}@\text{Bi}_{12}]^{4+}/[\text{An}@\text{Sb}_{12}]^{4+}$  structures.

|                                   |         |         |         |        |
|-----------------------------------|---------|---------|---------|--------|
| Species                           | Singlet | Triplet | Quintet |        |
| $[\text{Th}@\text{Bi}_{12}]^{4+}$ | 0.00    | 6.40    | 29.02   |        |
| $[\text{Th}@\text{Sb}_{12}]^{4+}$ | 0.00    | 10.36   | 37.47   |        |
| Species                           | Doublet | Quartet | Sextet  |        |
| $[\text{Pa}@\text{Bi}_{12}]^{4+}$ | 0.00    | 7.54    | 28.07   |        |
| $[\text{Pa}@\text{Sb}_{12}]^{4+}$ | 0.00    | 10.81   | 35.64   |        |
| Species                           | Singlet | Triplet | Quintet | Septet |
| $[\text{U}@\text{Bi}_{12}]^{4+}$  | 12.63   | 0.00    | 7.14    | 23.95  |
| $[\text{U}@\text{Sb}_{12}]^{4+}$  | 6.81    | 0.00    | 6.66    | 30.48  |

**Table S2.** Comparison of U-Bi bond distances of  $[\text{U}@\text{Bi}_{12}]^{3-}$  and  $[\text{U}@\text{Bi}_{12}]^{4+}$ .

| Bonds                     | $[\text{U}@\text{Bi}_{12}]^{3-}$ | $[\text{U}@\text{Bi}_{12}]^{4+}$ | Bonds                     | $[\text{U}@\text{Bi}_{12}]^{3-}$ | $[\text{U}@\text{Bi}_{12}]^{4+}$ |
|---------------------------|----------------------------------|----------------------------------|---------------------------|----------------------------------|----------------------------------|
| U-Bi1                     | 3.531                            | 3.689                            | U-Bi7                     | 3.533                            | 3.613                            |
| U-Bi2                     | 3.119                            | 3.168                            | U-Bi8                     | 3.134                            | 3.177                            |
| U-Bi3                     | 3.495                            | 3.692                            | U-Bi9                     | 3.545                            | 3.690                            |
| U-Bi4                     | 3.131                            | 3.168                            | U-Bi10                    | 3.150                            | 3.168                            |
| U-Bi5                     | 3.537                            | 3.614                            | U-Bi11                    | 3.514                            | 3.688                            |
| U-Bi6                     | 3.167                            | 3.177                            | U-Bi12                    | 3.127                            | 3.168                            |
| Average U-Bi <sub>A</sub> | 3.526                            | 3.664                            | Average U-Bi <sub>B</sub> | 3.138                            | 3.171                            |

**Table S3.** The experimental (Exp.) and calculated (Calc.) Th-Bi bond distances (Å) for the [Th@Bi<sub>12</sub>]<sup>4+</sup> complex at the PBE-D3/RECP theoretical level.

| Bonds                      | Exp.  | Calc. | Bonds                      | Exp.  | Calc. |
|----------------------------|-------|-------|----------------------------|-------|-------|
| Th-Bi1                     | 3.659 | 3.662 | Th-Bi7                     | 3.254 | 3.296 |
| Th-Bi2                     | 3.659 | 3.648 | Th-Bi8                     | 3.254 | 3.203 |
| Th-Bi3                     | 3.659 | 3.603 | Th-Bi9                     | 3.254 | 3.296 |
| Th-Bi4                     | 3.254 | 3.203 | Th-Bi10                    | 3.659 | 3.603 |
| Th-Bi5                     | 3.659 | 3.648 | Th-Bi11                    | 3.659 | 3.662 |
| Th-Bi6                     | 3.254 | 3.310 | Th-Bi12                    | 3.254 | 3.274 |
| Average Th-Bi <sub>A</sub> | 3.659 | 3.638 | Average Th-Bi <sub>B</sub> | 3.254 | 3.264 |

**Table S4.** The molecular orbital composition analysis of Th for [Th@Bi<sub>12</sub>]<sup>4+</sup> at the theoretical level of PBE-D3/RECP.

| [Th@Bi <sub>12</sub> ] <sup>4+</sup> | atom | s %  | p %   | d %   | f %  |
|--------------------------------------|------|------|-------|-------|------|
| HOMO-1(a'')                          | Th   |      |       | 6.60  | 4.35 |
|                                      | Bi   |      | 89.26 |       |      |
| HOMO-2(a')                           | Th   |      |       | 7.79  | 3.80 |
|                                      | Bi   |      | 88.25 |       |      |
| HOMO-3(a'')                          | Th   |      |       |       | 4.72 |
|                                      | Bi   |      | 93.00 |       |      |
| HOMO-5(a')                           | Th   | 2.42 | 2.80  | 4.89  |      |
|                                      | Bi   |      | 87.74 |       |      |
| HOMO-6(a')                           | Th   |      |       | 15.66 | 0.97 |
|                                      | Bi   |      | 81.51 |       |      |
| HOMO-7(a'')                          | Th   |      |       | 5.35  | 0.84 |
|                                      | Bi   |      | 91.46 |       |      |

**Table S5.** The molecular orbital composition analysis of Pa for  $[\text{Pa}@\text{Bi}_{12}]^{4-}$  at the theoretical level of PBE-D3/RECP.

| $[\text{Pa}@\text{Bi}_{12}]^{4-}$ | atom | s %  | p %   | d %   | f %   |
|-----------------------------------|------|------|-------|-------|-------|
| SOMO(a)                           | Pa   | 2.04 | 2.10  |       | 54.23 |
|                                   | Bi   |      | 41.04 |       |       |
| HOMO-1(a)                         | Pa   |      |       | 6.54  | 11.24 |
|                                   | Bi   |      | 81.06 |       |       |
| HOMO-2(a)                         | Pa   |      |       | 5.99  | 11.92 |
|                                   | Bi   |      | 80.32 |       |       |
| HOMO-3(a)                         | Pa   |      |       |       | 11.04 |
|                                   | Bi   |      | 86.23 |       |       |
| HOMO-5(a)                         | Pa   |      |       | 13.92 | 2.85  |
|                                   | Bi   |      | 82.57 |       |       |
| HOMO-6(a)                         | Pa   |      |       | 15.11 | 2.54  |
|                                   | Bi   |      | 80.69 |       |       |
| HOMO-7(a)                         | Pa   |      |       | 4.54  | 2.24  |
|                                   | Bi   |      | 89.44 |       |       |

**Table S6.** The molecular orbital composition analysis of U for  $[\text{U}@\text{Bi}_{12}]^{4-}$  at the theoretical level of PBE-D3/RECP.

| $[\text{U}@\text{Bi}_{12}]^{4-}$ | atom | s %  | p %   | d %   | f %   |
|----------------------------------|------|------|-------|-------|-------|
| SOMO(a'')                        | U    |      |       | 4.06  | 84.64 |
|                                  | Bi   |      | 8.85  |       |       |
| SOMO-1(a')                       | U    | 1.12 |       |       | 83.93 |
|                                  | Bi   |      | 11.60 |       |       |
| HOMO-1(a')                       | U    |      |       | 4.89  | 12.93 |
|                                  | Bi   |      | 80.60 |       |       |
| HOMO-2(a'')                      | U    |      |       | 5.44  | 12.45 |
|                                  | Bi   |      | 80.68 |       |       |
| HOMO-4(a')                       | U    |      |       |       | 10.23 |
|                                  | Bi   |      | 87.73 |       |       |
| HOMO-5(a'')                      | U    |      |       | 19.10 | 4.67  |
|                                  | Bi   |      | 73.85 |       |       |
| HOMO-6(a'')                      | U    |      |       | 16.63 | 5.33  |
|                                  | Bi   |      | 77.06 |       |       |
| HOMO-9(a'')                      | U    |      |       | 1.55  | 2.55  |
|                                  | Bi   | 1.08 | 92.20 |       |       |

**Table S7.** QAIM analysis of  $[\text{An}@\text{Bi}_{12}]^{4-}/[\text{An}@\text{Sb}_{12}]^{4-}$  at the PBE-D3/RECP theoretical level

| Clusters                             | BCPs               | $\rho(r)$ | $H(r)$   | $\nabla^2\rho(r)$ | $DI_{\text{total}}$ |
|--------------------------------------|--------------------|-----------|----------|-------------------|---------------------|
| $C_s[\text{Th}@\text{Bi}_{12}]^{4-}$ | An-Bi <sub>A</sub> | 0.02041   | -0.00241 | 0.02403           | 1.60899             |
|                                      | An-Bi <sub>B</sub> | 0.03821   | -0.00909 | 0.02334           | 3.33904             |
| $C_1[\text{Pa}@\text{Bi}_{12}]^{4-}$ | An-Bi <sub>A</sub> | 0.02178   | -0.00294 | 0.02447           | 1.99986             |
|                                      | An-Bi <sub>B</sub> | 0.04397   | -0.01155 | 0.02294           | 4.22372             |
| $C_s[\text{U}@\text{Bi}_{12}]^{4-}$  | An-Bi <sub>A</sub> | 0.02014   | -0.00240 | 0.02449           | 1.74464             |
|                                      | An-Bi <sub>B</sub> | 0.04165   | -0.01010 | 0.03004           | 4.09088             |
| $C_1[\text{Th}@\text{Sb}_{12}]^{4-}$ | An-Sb <sub>A</sub> | 0.02378   | -0.00335 | 0.02845           | 1.66499             |
|                                      | An-Sb <sub>B</sub> | 0.03866   | -0.00901 | 0.02258           | 3.19679             |
| $C_1[\text{Pa}@\text{Sb}_{12}]^{4-}$ | An-Sb <sub>A</sub> | 0.02552   | -0.00417 | 0.02623           | 2.15315             |
|                                      | An-Sb <sub>B</sub> | 0.04398   | -0.01142 | 0.01966           | 4.01572             |
| $C_1[\text{U}@\text{Sb}_{12}]^{4-}$  | An-Sb <sub>A</sub> | 0.02355   | -0.00348 | 0.03041           | 1.96317             |
|                                      | An-Sb <sub>B</sub> | 0.04246   | -0.01063 | 0.02401           | 3.81413             |

**Table S8.** Formation energies ( $\Delta E$ , kcal/mol) of  $[\text{An}@\text{Bi}_{12}]^{4-}/[\text{An}@\text{Sb}_{12}]^{4-}$  at the PBE-D3/RECP theoretical level.

| Reactions                                                                          | Formation Energies |
|------------------------------------------------------------------------------------|--------------------|
| $\text{Th}^{4+} + \text{Bi}_{12}^{8-} \rightarrow [\text{Th}@\text{Bi}_{12}]^{4-}$ | -461.6             |
| $\text{Pa}^{4+} + \text{Bi}_{12}^{8-} \rightarrow [\text{Pa}@\text{Bi}_{12}]^{4-}$ | -512.6             |
| $\text{U}^{4+} + \text{Bi}_{12}^{8-} \rightarrow [\text{U}@\text{Bi}_{12}]^{4-}$   | -538.0             |
| $\text{Th}^{4+} + \text{Sb}_{12}^{8-} \rightarrow [\text{Th}@\text{Sb}_{12}]^{4-}$ | -466.8             |
| $\text{Pa}^{4+} + \text{Sb}_{12}^{8-} \rightarrow [\text{Pa}@\text{Sb}_{12}]^{4-}$ | -517.4             |
| $\text{U}^{4+} + \text{Sb}_{12}^{8-} \rightarrow [\text{U}@\text{Sb}_{12}]^{4-}$   | -542.0             |

**Table S9.** Bond dissociation energies (BDEs,  $\Delta H$ , kcal/mol) of  $[\text{An}@Bi_{12}]^{4-}/[\text{An}@Sb_{12}]^{4-}$  at the PBE-D3/RECP theoretical level.

| Reactions                                                            | Th    | Pa    | U     |
|----------------------------------------------------------------------|-------|-------|-------|
| $[\text{An}@Bi_{12}]^{4-} \rightarrow \text{An} + Bi_{12}^{4-}$      | 238.9 | 245.8 | 270.1 |
| $[\text{An}@Bi_{12}]^{4-} \rightarrow \text{An}^{2+} + Bi_{12}^{6-}$ | 241.9 | 240.1 | 254.6 |
| $[\text{An}@Bi_{12}]^{4-} \rightarrow \text{An}^{4+} + Bi_{12}^{8-}$ | 462.1 | 513.0 | 538.4 |
| $[\text{An}@Sb_{12}]^{4-} \rightarrow \text{An} + Sb_{12}^{4-}$      | 202.3 | 220.7 | 240.0 |
| $[\text{An}@Sb_{12}]^{4-} \rightarrow \text{An}^{2+} + Sb_{12}^{6-}$ | 246.8 | 255.6 | 265.4 |
| $[\text{An}@Sb_{12}]^{4-} \rightarrow \text{An}^{4+} + Sb_{12}^{8-}$ | 467.6 | 518.0 | 542.5 |

**Table S10.** BDEs ( $\Delta H$ , kcal/mol) of  $[\text{An}@Bi_{12}]^{4-}$  at the PBE-D3/RECP theoretical level.

| Reactions                                                              | Th    | Pa   | U    |
|------------------------------------------------------------------------|-------|------|------|
| $[\text{An}@Bi_{12}]^{4-} \rightarrow Bi^{3+} + \text{An}Bi_{11}^{7-}$ | 100.6 | 90.2 | 96.2 |
| $[\text{An}@Bi_{12}]^{4-} \rightarrow Bi + \text{An}Bi_{11}^{4-}$      | 94.5  | 78.5 | 85.7 |
